# Supplementary material
Source: publisher site journal article supplement (https://www.dovepress.com/article/608026)
Supplement: Supplementary file 1 [file 608026%20Revised%20Supplementary%20Material.pdf]

**Supplementary Table Clinical information of patients from table 1**

| Sample number | Group        | Gender | PRL (ng/ml) | Age | BMI   | Knosp classification | Tumor size (cm) | Histopathological diagnosis        | Surgical outcome      |
|---------------|--------------|--------|-------------|-----|-------|----------------------|-----------------|------------------------------------|-----------------------|
| 1             | Prolactinoma | Male   | 5713        | 48  | 29.38 | Grade 4              | 4.3x4.6x3.7     | Lactotroph tumor                   | Gross total resection |
| 2             | Prolactinoma | Female | 126         | 26  | 19.76 | Grade 3              | 3.6x2.5x2.9     | Lactotroph tumor                   | Subtotal resection    |
| 3             | Prolactinoma | Female | 5367        | 54  | 28.89 | Grade 4              | 4.0x4.5x3.4     | Lactotroph tumor                   | Gross total resection |
| 4             | Prolactinoma | Male   | 2538        | 44  | 26.89 | Grade 3              | 2.5x1.5x2.5     | Lactotroph tumor                   | Gross total resection |
| 5             | Prolactinoma | Female | 391         | 51  | 28.52 | Grade 2              | 1.5x1.3x1.2     | Lactotroph tumor                   | Gross total resection |
| 6             | NF-PitNET    | Male   | 26.9        | 56  | 22.68 | Grade 3              | 2.6x4.0x3.0     | Gonadotroph tumor                  | Gross total resection |
| 7             | NF-PitNET    | Female | 6.7         | 52  | 35.16 | Grade 4              | 2.7x2.1x3.4     | Gonadotroph tumor                  | Subtotal resection    |
| 8             | NF-PitNET    | Female | 0.5         | 57  | 23.06 | Grade 2              | 1.8x1.8x2.6     | Gonadotroph tumor                  | Gross total resection |
| 9             | NF-PitNET    | Male   | 6.6         | 56  | 24.32 | Grade 3              | 2.1x2.9x3.7     | Gonadotroph and Corticotroph tumor | Gross total resection |
| 10            | NF-PitNET    | Male   | 8.8         | 41  | 29.01 | Grade 2              | 4.5x3.5x3.0     | Gonadotroph tumor                  | Gross total resection |
